# Supplementary material for: The Tripartite Lichen Ricasolia virens: Involvement of Cyanobacteria and Bacteria in Its Morphogenesis
Source: MDPI journal article supplement (doi:10.3390/microorganisms11061517), 2023-06-07
Supplement: s1 [file s1]

**Supplementary Table S1.** Specimens used for anatomical studies.

| Code      | Lat/Lon ED50                    | Phorophyte                                       | Zone                               | Height (masl) | Collected by                              |
|-----------|---------------------------------|--------------------------------------------------|------------------------------------|---------------|-------------------------------------------|
| Vi1       | N 43° 26' 10"; W 5° 12' 45,0"   | <i>Ulmus glabra</i> Huds.                        | Hayedo de la Biescona <sup>a</sup> | 420           | <i>E. Barreno &amp; JS. Álvarez-Aspra</i> |
| Vi2       | N 43° 20' 12"; W 5° 12' 43,4"   | <i>Fagus sylvatica</i> L.                        | Hayedo de la Biescona <sup>a</sup> | 430           | <i>JS. Álvarez-Aspra</i>                  |
| Vi3       | N 43° 26' 11"; W 5° 12' 50,0"   | <i>Fagus sylvatica</i> L.                        | Hayedo de la Biescona <sup>a</sup> | 442           | <i>JS. Álvarez-Aspra</i>                  |
| Vi4       | N 43° 26' 14"; W 5° 12' 46,5"   | <i>Quercus robur</i> L.                          | Hayedo de la Biescona <sup>a</sup> | 475           | <i>JS. Álvarez-Aspra</i>                  |
| Vi5       | N 43° 26' 14,2"; W 5° 12' 46,0" | <i>Quercus robur</i> L.                          | Hayedo de la Biescona <sup>a</sup> | 477           | <i>JS. Álvarez-Aspra</i>                  |
| Vi6       | N 43° 26' 11,2"; W 5° 12' 47,6" | <i>Quercus robur</i> L.                          | Hayedo de la Biescona <sup>a</sup> | 432           | <i>JS. Álvarez-Aspra</i>                  |
| Vi7       | N 43° 26' 14"; W 5° 12' 50,5"   | <i>Quercus robur</i> L. y <i>Hedera helix</i> L. | Hayedo de la Biescona <sup>a</sup> | 460           | <i>JS. Álvarez-Aspra</i>                  |
| Vi8       | N 43° 26' 14,4"; W 5° 12' 47,2" | <i>Quercus robur</i> L. y <i>Hedera helix</i> L. | Hayedo de la Biescona <sup>a</sup> | 484           | <i>JS. Álvarez-Aspra</i>                  |
| Vi9       | N 43° 26' 14,4"; W 5° 12' 47,4" | <i>Quercus robur</i> L. y <i>Hedera helix</i> L. | Hayedo de la Biescona <sup>a</sup> | 484           | <i>JS. Álvarez-Aspra</i>                  |
| Vi10      | N 43° 26' 15"; W 5° 12' 46,7"   | <i>Quercus robur</i> L. y <i>Hedera helix</i> L. | Hayedo de la Biescona <sup>a</sup> | 484           | <i>JS. Álvarez-Aspra</i>                  |
| Vi11      | N 43° 26' 15"; W 5° 12' 46,7"   | <i>Quercus robur</i> L. y <i>Hedera helix</i> L. | Hayedo de la Biescona <sup>a</sup> | 480           | <i>JS. Álvarez-Aspra</i>                  |
| Vi12      | N 43° 26' 14"; W 5° 12' 46,1"   | <i>Quercus robur</i> L. y <i>Hedera helix</i> L. | Hayedo de la Biescona <sup>a</sup> | 480           | <i>JS. Álvarez-Aspra</i>                  |
| Vi13      | N 43° 27' 1,7"; W 5° 14' 50,5"  | <i>Castanea sativa</i> Miller                    | Sierra del Sueve <sup>b</sup>      | 625           | <i>JS. Álvarez-Aspra</i>                  |
| Ve1 a Ve7 | N 43° 26' 55"; W 5° 10' 00"     | <i>Fraxinus excelsior</i> L.                     | Vega de Sebarga <sup>c</sup>       | 206           | <i>V.M. Vázquez &amp; P. Vázquez</i>      |
| H1 a H4   | N 43° 15' 38"; W 6° 53' 01"     | <i>Acer pseudoplatanus</i> L.                    | Riberas del Río Ahío <sup>d</sup>  | 189           | <i>V.M. Vázquez &amp; P. Vázquez</i>      |
| H5 a H8   | N 43° 15' 38"; W 6° 53' 01"     | <i>Quercus robur</i> L.                          | Riberas del Río Ahío <sup>d</sup>  | 189           | <i>V.M. Vázquez &amp; P. Vázquez</i>      |
| H9 a H12  | N 43° 15' 38"; W 6° 53' 01"     | <i>Hedera helix</i> L.                           | Riberas del Río Ahío <sup>d</sup>  | 189           | <i>V.M. Vázquez &amp; P. Vázquez</i>      |

a. Hayedo de la Biescona (Caravia)

b. Sierra del Sueve, la Cordobana (Colunga), near the *Taxus Baccata* L forest.

c. Vega de Sebarga (Amieva). Melon river shores..

d. Riberas del Río Ahío. Pesoz.

**Supplementary Table S2.** Herbarium University of Valencia (VAL-Lich) Specimens revised.

| Code  | VAL-Lich | Lat;Lon ED50                      | Phorophyte                             | Zone                         | Height (masl) | Identified by                        | Date       |
|-------|----------|-----------------------------------|----------------------------------------|------------------------------|---------------|--------------------------------------|------------|
| Heb1  | 20370    | N 43° 01' 56,7''; W 6° 41' 32,3'' | <i>Fraxinus excelsior</i> L.           | Monte Muniellos <sup>a</sup> | 690           | <i>S. Pérez-Ortega &amp; S. Fos.</i> | 19/10/2000 |
| Heb2  | 20606    | N 43° 01' 56,7''; W 6° 41' 32,3'' | <i>Quercus petraea</i> (Matt.) Liebl.) | Monte Muniellos <sup>b</sup> | 940           | <i>S. Pérez-Ortega &amp; S. Fos.</i> | 18/10/2000 |
| Heb3  | 20808    | N 43° 01' 56,7''; W 6° 41' 32,3'' | <i>Quercus petraea</i> (Matt.) Liebl.) | Monte Muniellos <sup>b</sup> | 870           | <i>S. Pérez-Ortega &amp; S. Fos.</i> | 18/10/2000 |
| Heb4  | 20944    | N 43° 01' 56,7''; W 6° 41' 32,3'' | <i>Populus canadensis</i> Moench       | Monte Muniellos <sup>a</sup> | 690           | <i>S. Pérez-Ortega &amp; S. Fos.</i> | 19/10/2000 |
| Heb5  | 22102    | N 43° 01' 56,7''; W 6° 41' 32,3'' | <i>Acer pseudoplatanus</i> L.          | Monte Muniellos <sup>a</sup> | 690           | <i>S. Pérez-Ortega &amp; S. Fos.</i> | 19/10/2000 |
| Heb6  | 22114    | N 43° 01' 56,7''; W 6° 41' 32,3'' | <i>Populus canadensis</i> Moench       | Monte Muniellos <sup>a</sup> | 690           | <i>S. Pérez-Ortega &amp; S. Fos.</i> | 19/10/2000 |
| Heb7  | 22434    | N 43° 01' 56,7''; W 6° 41' 32,3'' | <i>Fagus silvatica</i> L.              | Monte Muniellos <sup>c</sup> | 740           | <i>S. Pérez-Ortega &amp; S. Fos.</i> | 20/03/2003 |
| Heb8  | 25074    | N 43° 15' 24.1''; W 01° 49' 02''  | <i>Ulmus glabra</i> Huds.              | Oiartzum <sup>d</sup>        | 250           | <i>B. Aguirre &amp; G. Renobales</i> | 27/04/1984 |
| Heb9  | 28937    | N 28° 08' 51''; W 17° 17' 46''    | <i>Erica arborea</i> L.                | Valle Gran Rey <sup>e</sup>  | 1025          | <i>V. Calatayud</i>                  | 29/07/1998 |
| Heb10 | 28938    | N 28° 07' 20''; W 17° 13' 22''    | <i>Laurus azorica</i> (Seub.) Franco   | Las Mimbreras <sup>f</sup>   | 975           | <i>V. Calatayud</i>                  | 29/07/1998 |

a. Ribereña con plágano atravesada por el río Tablizas. Monte Muniellos (Cangas de Narcea).

b. Camino de Fuenculebrera. Monte Muniellos (Cangas de Narcea).

c. Camino de Pico Luis. Monte Muniellos (Cangas de Narcea).

d. Parque natural de Aiako Harria. Oiartzun (País Vasco)

e. Valle Gran Rey. Raso de D. Pedro. La Gomera

f. Las Mimbreras. La Gomera.

**Supplementary Table S3.** Location and GenBank accession numbers for collections of *Ricasolia virens* samples used in this study.

| Locality                                                   | Sample code | ITS<br>Mycobiont | ITS<br>Photobionts | 16 S     | 23SU     |
|------------------------------------------------------------|-------------|------------------|--------------------|----------|----------|
| Riberas del Río Ahío. Pesoz<br>(Asturias, Spain)           | <b>H4</b>   | OP925492         | OP932022           | OP925747 | OP932028 |
| Riberas del Río Ahío. Pesoz<br>(Asturias, Spain)           | <b>H10</b>  | OP925493         | OP932023           | OP925748 | OP932029 |
| Vega de Sebarga (Amieva).<br>Melón river (Asturias, Spain) | <b>VE5</b>  | OP925494         | OP932024           | OP925749 | OP932030 |
| Vega de Sebarga (Amieva).<br>Melón river (Asturias, Spain) | <b>VE6</b>  | OP925495         | OP932025           | OP925750 | OP932031 |
| Hayedo de la Biescona<br>(Caravia) (Asturias, Spain)       | <b>VI1</b>  | OP925496         | OP932026           | OP925751 | OP932032 |
| Hayedo de la Biescona<br>(Caravia) (Asturias, Spain)       | <b>VI3</b>  | OP925497         | OP932027           | OP925752 | OP932033 |
